# Supplementary material for: GDF15 mediates inflammation-associated bone loss through a brain-bone axis
Source: Research Square preprint supplement (doi:10.21203/rs.3.rs-3824212/v1), 2024-01-24
Supplement: Supplementary file 1 [file 34e54e877be676a03ff7bb3e.docx]

**Supplementary tables**

**Supplementary Table 1, Accumulated analysis of variance tables for simple linear regression with groups between serum GDF15 levels measured in DEXA-scanned RA patients and healthy controls, and various BMD parameters.**

| Accumulated analysis of variance: **serum GDF15 vs** **total hip BMD** (HTOT_BMD) | | | | | |
| --- | --- | --- | --- | --- | --- |
| *Change* | *d.f.* | *s.s.* | *m.s.* | *v.r.* | *F pr.* |
| + age | 1 | 1356946 | 1356946 | 83.88 | <.001 |
| + group | 1 | 129795. | 129795. | 8.02 | 0.006 |
| + HTOT_BMD | 1 | 44593. | 44593. | 2.76 | 0.100 |
| **+ HTOT_BMD.GROUP** | 1 | 119750. | 119750. | 7.40 | **0.008** |
| Residual | 95 | 1536883. | 16178. | - | - |
| Total | 99 | 3187967. | 32202. | - | - |
| Accumulated analysis of variance: **serum GDF15 vs** **femur neck BMD** | | | | | |
| *Change* | *d.f.* | *s.s.* | *m.s.* | *v.r.* | *F pr.* |
| + age | 1 | 1356946 | 1356946 | 83.88 | <.001 |
| + group | 1 | 129795. | 129795. | 8.02 | 0.006 |
| + NECK_BMD | 1 | 60348. | 60348. | 3.72 | 0.057 |
| + **NECK_BMD.GROUP** | 1 | 99470. | 99470. | 6.13 | **0.015** |
| Residual | 95 | 1541408. | 16225. | - | - |
| Total | 99 | 3187967. | 32202. | - | - |
| Accumulated analysis of variance: **serum GDF15 vs** **inter-trochanter BMD** | | | | | |
| *Change* | *d.f.* | *s.s.* | *m.s.* | *v.r.* | *F pr.* |
| + age | 1 | 1356946 | 1356946 | 83.88 | <.001 |
| + group | 1 | 129795. | 129795. | 8.00 | 0.006 |
| + INTER_BMD | 1 | 35494 | 35494 | 2.19 | 0.142 |
| **+ INTER_BMD.GROUP** | 1 | 123942. | 123942. | 7.64 | **0.007** |
| Residual | 95 | 1541790. | 16229. | - | - |
| Total | 99 | 3187967. | 32202. | - | - |
| Accumulated analysis of variance: **serum GDF15 vs** **wards BMD** | | | | | |
| *Change* | *d.f.* | *s.s.* | *m.s.* | *v.r.* | *F pr.* |
| + age | 1 | 1356946 | 1356946 | 81.52 | <.001 |
| + group | 1 | 129795. | 129795. | 7.80 | 0.006 |
| + WARDS_BMD | 1 | 50062. | 50062. | 3.01 | 0.086 |
| **+ WARDS_BMD.GROUP** | 1 | 69817. | 69817. | 4.19 | **0.043** |
| Residual | 95 | 1581346. | 16646. | - | - |
| Total | 99 | 3187967. | 32202. | - | - |
| Accumulated analysis of variance: **serum GDF15 vs** **trochanter BMD** | | | | | |
| *Change* | *d.f.* | *s.s.* | *m.s.* | *v.r.* | *F pr.* |
| + age | 1 | 1356946 | 1356946 | 84.01 | <.001 |
| + group | 1 | 129795. | 129795. | 8.04 | 0.006 |
| + TROCH_BMD | 1 | 76038. | 76038. | 4.71 | 0.033 |
| **+ TROCH_BMD.GROUP** | 1 | 90718. | 90718. | 5.62 | **0.020** |
| Residual | 95 | 1534470 | 16152. | - | - |
| Total | 99 | 3187967. | 32202. | - | - |

The factor “GROUP” represents the two patient groups: RA or healthy control. The reported p-values are highlighted in bold and refer to the significance of the difference in regression coefficients between patient groups. d.f. = degrees of freedom; s.s. = sum of squares; m.s. = mean of sum of squares; v.r. = variance ratio; pr = probability.

**Supplementary Table 2, patient characteristics**

Cohort 1: RA, SpA and HC

|  | **Healthy controls** | **RA** | **SpA** |
| --- | --- | --- | --- |
| Total number (n) | 20 | 20 | 111 |
| Females (number) | 11 | 16 | 58 |
| Males (number) | 9 | 4 | 53 |
| Age (years) (mean ± SD) | 30.85 ± 6.60 | 56.2 ± 14.47 | 35.01 ± 10.54 |
| BMI(mean ± SD) | - | 28.88 ± 4.3 | 25.67 ± 4.59 |
| Anti-TNF treated (number) | - | 1 | 2 |
| CRP mg/l (mean ± SD) | - | 2.3 ± 7.16 | 1 ± 1.66 |
| SJC (mean ± SD) | - | 2.7 ± 3.757 | 0.9 ± 2.9 |
| TJC (mean ± SD) | - | 3.55 ± 4.86 | 1.86 ± 4.45 |
| Axial arthritis (number) | - | - | 71 |
| Peripheral arthritis (number) | - | - | 17 |
| Mixed axial/peripheral (number) | - | - | 23 |
| Psoriasis (number) | - | - | 16 |
| ASDAS (mean ± SD) | - | - | 4.35 ± 2.60 |
| BASDAI (mean ± SD) | - | - | 2.03 ± 0.92 |
| HLAB27+ (number) | - | - | 83 |

SJC = Swollen Joint Count; TJC = Tender Joint Count; ASDAS = Ankylosing Spondylitis Disease Activity Score; BASDAI = Bath Ankylosing Spondylitis Disease Activity Index.

Cohort 2: PsA versus HC

|  | **Healthy controls** | **PsA** |
| --- | --- | --- |
| Total number (n) | 31 | 110 |
| Females (number) | 13 | 53 |
| Males (number) | 18 | 57 |
| Age (years) (mean ± SD) | 39.8 ± 8.42 | 49.37 ± 12.9 |
| BMI(mean ± SD) | - | 28.43 ± 5.53 |
| DAPSA (mean ± SD) | - | 13.44 ± 10.43 |
| CRP mg/l (mean ± SD) | - | 7.39 ± 6.02 |
| Biological treated (number) | - | 72 |

DAPSA = Disease Activity index for PSoriatic Arthritis

Cohort 3: Psoriasis patients

|  | **Psoriasis** |
| --- | --- |
| Total number (n) | 29 |
| Females (number) | 12 |
| Males (number) | 17 |
| Age (years) (mean ± SD) | 45.03 ± 16.65 |
| Obese patients (number) | 8 |
| PASI (mean ± SD) | 9.24 ± 6.88 |
| Biological experienced (number) | 9 |
| Patients with a history of joint complaints (number) | 3 |
| Patients with joint complaints at time of blood draw (number) | 0 |

PASI = Psoriasis Area and Severity Index

Cohort 4: DEXA cohort

|  | **Healthy controls** | **RA** |
| --- | --- | --- |
| Total number (n) | 54 | 46 |
| Females (number) | 29 | 33 |
| Males (number) | 34 | 20 |
| Age (years) (mean ± SD) | 46.62 ± 13.24 | 55.88 ± 12.20 |
| BMI(mean ± SD) | 24.55 ± 3.82 | 25.94 ± 4.79 |
| DAS28 (mean ± SD) | - | 5.53 ± 8.51 |
| CRP mg/ml (mean ± SD) | - | 14.38 ± 17.23 |
| SJC (mean ± SD) | - | 4.96 ± 4.82 |
| Biological-treated (number) | - | 6 |

DAS28 = Disease Activity Score 28‐joint count; SJC = Swollen Joint Count

**Supplementary Table 3, qPCR primer sequences**

| Gene | Forward primer  OR Taqman probe ID | Reverse primer |
| --- | --- | --- |
| *Gfral* | TTCCTGGCTGTTACGTTAAGC | GCCATTTGCATCAATCAAGCA |
| *Pparg* | TCACAATGCCATCAGGTTTGG | CTGGGTTCAGCTGGTCGATA |
| *Cebpa* | TTCGGGTCGCTGGATCTCTA | CCCTCATCTTAGACGCACCG |
| *Adipoq* | ATCTGGAGGTGGGAGACCAA | GGGCTATGGGTAGTTGCAGT |
| *Apoe* | TCGAGTGGCAAAGCAACCAA | TCAGTGCCGTCAGTTCTTGT |
| *Lpl* | TGCCCTAAGGACCCCTGAAG | ACATTCCCGTTACCGTCCATC |
| *Lepr* | ATGGTCACCCAGCACAATCC | GACGCAGTTTTTGGGCTCAG |
| *Cxcl12* | AAACTGTGCCCTTCAGATTG | GCCTCTTGTTTAAAGCTTTCTC |
| *Il1rn* | TAGTGTGTTCTTGGGCATCCA | TCAGTGATGTTAACTTCCTCCAG |
| *Serpina3g* | GAACCCCTTTGACCCGAATGA | GGGAGTTGTCAGGTAACCAGTTT |
| *Kng1* | TTGCACCGAGTGATCGAGG | TCAGCGTCCTTGAAGTCACA |
| *Kng2* | CACTGGAGAATGCACAGCAAC | ACAACTCGCACAGTGGTACTC |
| *Agt* | ACCCAGTTCTTGCCACTGAG | AAACCTCTCATCGTTCCTTGG |
| *Esm1* | CCGTACAGTCTCAGGCATGG | CCATCCCGAAGGTGCCATAG |
| *Gdpd2* | CATTGGGGACACTGGATGGA | CCCAGGAGCAATAGCAAGGAT |
| *Tnfsf11* | TGATGGAAGGCTCATGGTTGG | GACTTTATGGGAACCCGATGG |
| *Csf1* | AGACCAGGAACAGCTGGATGA | TCTCGGTGGCGTTAGCATTG |
| *Adrb2* | TCGTGCACGTTATCAGGGAC | GTTGACGTAGCCCAACCAGT |
| *Bglap* | CCCTGAGTCTGACAAAGCCT | ACTGAAGCTCCAAGGTAGCG |
| *Ly6g* | GGGAGGGGCTGAGAGAAAGTA | AGGGCTGCACAGATAAAACTTCC |
| *Ptprc* | TCCTCGTCCACTGCAGAGAT | CCGTGCTTTGCGTAGAGACT |
| *Thy1* | ACCAAGGATGAGGGCGACTA | ACACTTGACCAGCTTGTCTCTA |
| *Gapdh* | ACCCCAGCAAGGACACTGAGCAAG | TGGGGGTCTGGGATGGAAATTGTG |
| *Pgk1* | CTCCGCTTTCATGTAGAGGAAG | GACATCTCCTAGTTTGGACAGTG |
| *CEBPA* | AAGCACGATCAGTCCATCCC | AGACGCGCACATTCACATTG |
| *ADIPOQ* | GTATCCCCAAGCCACACCAT | TACACTTGCTGGGGCATCTG |
| *ESM1* | TGTGACAGCAGTGAGTGCAA | TGAGACTGTGCGGTAGCAAG |
| *PTPRC* | CAACAGTGGAGAAAGGACGC | GGCAAAGCCAAATGCCAAGA |
| *GAPDH* | Taqman: Hs02786624_g1 | - |
| *SERPINA3* | Taqman: Hs00153674_m1 | - |
| *CXCL12* | Taqman: Hs03676656_mH | - |

**Supplementary Table 4: FACS antibodies**

| **PRODUCT** | **COMPANY** | **CAT. NR.** |
| --- | --- | --- |
| **LYMPHOID PANEL** | | |
| **Live/Dead staining (10min, 4°c)** | | |
| Fixable Viability Dye eFluor506 | Thermofisher | 65-0866-14 |
| **Blocking (10min, 4°c)** | | |
| FcR blocking | Miltenyi | 130-092-575 |
| Monocyte blocking | Biolegend | 2000135006 |
| **Surface staining (30min, 4°C)** | | |
| Cell staining buffer | Biolegend | 420201 |
| Brilliant stain buffer | BD | 563794 |
| CD127-AF700 | Thermofisher | 56-1271-80 |
| CD45-BUV395 | BD | 564279 |
| TCRgd-BV605 | Biolegend | 118129 |
| CD3-BV711 | Biolegend | 100241 |
| CD4-BV785 | Biolegend | 100452 |
| CD8-PE-Cy7 | Biolegend | 100721 |
| NK1.1-PECy5 | Biolegend | 108716 |
| I-A-APCeFluor780 | Thermofisher | 47-5321-80 |
| CD19-APCeFluor780 | Life technologies | 47-0199-42 |
| CD11b-APC.Cy7 | BD | 557657 |
| TCRb-BUV737 | BD | 564799 |
| **Lymphoid panel intracellular staining (30min, room temperature)** | | |
| Ki67-AF488 | BD | 561165 |
| GATA3-BB700 | BD | 566643 |
| RORgT-PE | Thermofisher | Cat. 12-6982-82 |
| Tbet-PB | Biolegend | 644808 |
| FoxP3-AF647 | Biolegend | 126407 |
| **MYELOID PANEL** | | |
| **Live/Dead staining (10min, 4°c)** | | |
| Fixable Viability Dye eFluor506 | Thermofisher | 65-0866-14 |
| **Blocking (10min, 4°c)** | | |
| FcR blocking | Miltenyi | 130-092-575 |
| Monocyte blocking | Biolegend | 2000135006 |
| **Surface staining (30min, 4°C)** | | |
| Cell staining buffer | Biolegend | 420201 |
| Brilliant stain buffer | BD | 563794 |
| F4/80-biotin | Thermofisher | 13-4801-82 |
| Ly6C-BV605 | Biolegend | 128035 |
| CD64-BV711 | Biolegend | 139311 |
| SIRPa-PE.Cy7 | Biolegend | 144008 |
| CD206-APC | Biolegend | 141707 |
| Ly6G-PerCPCy5.5 | BD | 560602 |
| CD103-PE | Thermofisher | 12-1031-82 |
| CD3-PECy5 | eBioscience | 15-0031-82 |
| CD19-PECy5 | eBioscience | 15-0193-82 |
| NK1.1-PECy5 | TONBO | 65-5941-U100 |
| SiglecF-BUV395 | BD | 750280 |
| CD11c-PE.eFluor610 | Thermofisher | 61-0114-82 |
| I-A-BV785 | Biolegend | 197645 |
| CD45-APCeFluor780 | eBioscience | 47-045180 |
| XCR1-BV650 | Biolegend | 148220 |
| CD11b-BUV737 | BD | 564443 |
| CD86-FITC | BD | 553691 |
| **Myeloid panel secondary staining (15min, 4°C)** | | |
| Streptavidin-BV421 | BD | 563259 |
| **MOUSE MALP PANEL** | | |
| **Live/Dead staining (30min, 4°c)** | | |
| Zombie NIR | Biolegend | 423106 |
| **Blocking (10min, 4°c)** | | |
| FcR blocking | Miltenyi | 130-092-575 |
| Monocyte blocking | Biolegend | 2000135006 |
| **Surface staining antibodies (30min, 4°C)** | | |
| CD90-BV510 | Biolegend | 140319 |
| CD34-PE/Dazzle | Biolegend | 119329 |
| CD117-APC | Biolegend | 105811 |
| Sca1-BUV496 | BD | 750169 |
| CD3-FITC | Biolegend | 155603 |
| CD45-BV570 | Biolegend | 103135 |
| CD106-BUV737 | Biolegend | 741726 |
| Ter119-FITC | Biolegend | 116205 |
| Qa2-BV421 | BD | 743309 |
| CD59a-PE | Biolegend | 143103 |
| PDPN-PE-Cy7 | Thermofisher | 25-5381-82 |
| CD45RB-FITC | Biolegend | 103305 |
| CD11b-FITC | Invitrogen | 11-0112-41 |
| CD31-BV711 | Biolegend | 102449 |
| Ly6G-FITC | Biolegend | 127605 |
| **HUMAN MALP PANEL FOR FLOW CYTOMETRY** | | |
| **LIVE/DEAD STAINING** | | |
| Zombie NIR | Biolegend | 423106 |
| **SURFACE STAINING** | | |
| CD71-BUV615 | BD | 743308 |
| CD45-PerCP | Biolegend | 304026 |
| CD11b-SparkYG593 | Biolegend | 101282 |
| CD11c-Pacific Blue | Biolegend | 301626 |
| Podoplanin-APC-Fire750 | Biolegend | 337023 |
| ALP-AlexaFluor647 | BD | 561600 |
| CD31-BV605 | Biolegend | 303121 |
| CD34-BV785 | Biolegend | 343625 |
| CD90-BUV395 | BD | 56804 |
| CD117-BV650 | BD | 563859 |
| CD115-PE-Dazzle594 | Biolegend | 305817 |
| ADRB2 unconjugated | Thermofisher | BS-0947R |
| CD106-PE-Cy7 | Biolegend | 305817 |
| **SECONDARY STAINING** | | |
| Rabbit IgG-FITC | Abcam | ab6717 |
| **HUMAN MALP PANEL FOR SORTING** | | |
| **LIVE/DEAD STAINING** | | |
| Live dead Blue | Thermofisher | L23105 |
| CD90-PE | Biolegend | 328109 |
| CD71-PE | Biolegend | 334105 |
| CD31-PE | Biolegend | 303105 |
| CD117-PE | Biolegend | 313203 |
| CD34-PE | Biolegend | 343605 |
| CD45-PE | Biolegend | 304058 |
| ALP-PE | BD | 561433 |
| Podoplanin-PE | Biolegend | 227003 |
| CD106-PE-Cy7 | Biolegend | 305817 |
| ADRB2 unconjugated | Thermofisher | BS-0947R |
| **SECONDARY STAINING** | | |
| Rabbit IgG-FITC | Abcam | ab6717 |
