# Supplementary material for: GDF15 mediates inflammation-associated bone loss through a brain-bone axis
Source: Research Square preprint supplement (doi:10.21203/rs.3.rs-3824212/v1), 2024-01-24
Supplement: Supplementary file 2 [file e9deadca2b0dbf5f17021926.docx]

**Supplementary Methods**

**Creation of GFRAL-KO mice**

Synthetic Alt-R® CRISPR-Cas9 crRNA (Integrated DNA Technologies) with protospacer sequences 5’ AAAGTTTGTTTACTGTACAG 3’ and 5’ TAACCTGAGTATCCAGGCTT 3’ were duplexed with synthetic Alt-R® CRISPR-Cas9 tracrRNA (Integrated DNA Technologies). cr/tracrRNA duplexes (100ng/µl) were complexed with Cas9-eGFP Nuclease (500ng/µl) (VIB Protein Core). The resulting RNP complexes were electroporated into C57BL/6J zygotes using a Nepa21 electroporator with electrode CUY501P1-1.5 using following electroporation parameters: poring pulse = 40V; length 3.5ms; interval 50ms; No. 4; D. rate 10%; polarity + and transfer pulse = 5V; length 50ms; interval 50ms; No. 5; D. rate 40%; polarity +/-. Electroporated embryos were incubated overnight in Embryomax KSOM medium (Merck, Millipore) in a CO2 incubator at 37°C. The following day, 2-cell embryos were transferred to pseudopregnant B6CBAF1 foster mothers. The resulting pups were screened by PCR over the target region using primers 5’ CCTGGCACTTTGAGTATT 3’ and 5’ TAGCCAGCATTAGACCATT 3’. PCR bands were Sanger sequenced to identify the exact nature of the deletion. Mouse line Gfralem1Irc contains an allele with a deletion of 58bp (chr 9:76112664-76112721) in exon 3 (ENSMUSE00000496764) of the *Gfral* gene (ENSMUSG00000059383). This deletion creates a frameshift resulting in premature stop codons and NMD. All base annotations are according to C57BL/6J genome assembly GRCm39.

**µCT scanning**

The scans were performed at the Centre for X-ray Tomography of the Ghent University (UGCT, www.ugct.ugent.be) using the HECTOR micro-CT scanner. This system makes use of an X-RAY WorX directional type X-ray tube and was updated with a Varex XRD 4343 flat-panel detector with CsI scintillator, measuring 43x43cm2 and having 2880x2880 pixels with a pixel pitch of 150 µm. The scans were performed using a tube voltage of 130 kV, a tube power of 10 W and no beam filtering was applied. During each scan 2001 projections with an exposure time of 1 second per projection were taken covering a full sample rotation of 3600. During scanning, the tibiae were kept in a closed tube containing a few drops of 70% ethanol to prevent tissue dehydration. Before the reconstruction of each scan the projection images were clipped to 2200x2200 pixels. The 3D reconstruction was performed using Octopus, a reconstruction software package developed at UGCT, yielding a 10.6 gigavoxel reconstructed volume with an isotropic voxel size of 4 µm.

**Mouse bulk RNAseq sequencing**

RNA concentration and purity were determined spectrophotometrically using the Nanodrop ND-8000 (Nanodrop Technologies) and RNA integrity was assessed using a Fragment Analyzer (Agilent). Per sample, an amount of 500ng of total RNA was used as input. Using the Illumina TruSeq® Stranded mRNA Sample Prep Kit (protocol version: Part # 1000000040498 v00 - October 2017) poly-A containing mRNA molecules were purified from the total RNA input using poly-T oligo-attached magnetic beads. In a reverse transcription reaction using random primers, RNA was converted into first strand cDNA and subsequently converted into double-stranded cDNA in a second strand cDNA synthesis reaction using DNA PolymeraseI and RNAse H. The cDNA fragments were extended with a single 'A' base to the 3' ends of the blunt-ended cDNA fragments after which multiple indexing adapters were ligated introducing different barcodes for each sample. Finally, enrichment PCR was carried out to enrich those DNA fragments that have adapter molecules on both ends and to amplify the amount of DNA in the library. Sequence-libraries of each sample were equimolarly pooled and sequenced on Illumina NovaSeq 6000 (v1 kit, 100 cycles, Single Reads) at the VIB Nucleomics Core (www.nucleomics.be).

**Vertebral biopsy acquisition**

From chronic low back pain patients undergoing spinal fusion surgery at the Balgrist University Hospital, Switzerland, a bone marrow biopsy was collected with a Jamshidi bone marrow biopsy needle (HS HOSPITAL SERVICE S.P.A., 8G x 100mm) using the pedicle screw trajectories prior to screw insertion. The vertebral body from which the biopsy was collected did not show any sign of abnormality on magnetic resonance images. MR images were graded by a radiologist with >14 years overall experience and with >7 years in musculoskeletal radiology (NAFA) based on available sagittal T1-weighted (T1w), T2w, Short Tau Inversion Recovery (STIR), and coronal T2w sequences. The mean difference from MRI acquisition to date of surgery was 35 ± 45.99 days. In the operating room, biopsies were immediately transferred to Hanks’ Balanced Salt solution (HBSS) (Sigma-Aldrich).

**Vertebral biopsy single cell sequencing**

A LUNA-FX7 Automated Cell Counter (Logos) was used to determine the cell viability and concentration. Approximately 16,500 cells per sample were loaded onto the 10x Chip G for the experiment, and it was expected that around 10,000 cells could be recovered per library preparation. Cells were then combined with a master mix that contains reverse transcription reagents. The single cell 3’ v3.1 gel beads, carrying the Illumina TruSeq Read1, a 16bp 10x barcode, a 12bp UMI and a poly-dT primer, were loaded onto the chip along with oil for the emulsion reaction. The Chromium X system partitions the cells into nanolitre-scale gel beads in emulsion (GEMs), where the process of reverse-transcription (RT) takes place. All cDNAs within a GEM share a common barcode. After the RT reaction, the GEMs were broken and the full length cDNAs was captured by MyOne SILANE Dynabeads and then amplified with 11 cycles. The amplified cDNA was cleaned up with SPRI beads. After purification, the cDNAs were qualitatively and quantitatively analysed using an Agilent 4200 TapeStation High Sensitivity D5000 ScreenTape. The cDNA was then enzymatically sheared and in the meantime the end of fragments was repaired and A-tailed. Subsequently, sequencing libraries were constructed using the double-sided size selected cDNA fragments. This involved adapter ligation, a sample index PCR with 13 cycles, and SPRI bead clean-ups. The sample index PCR incorporated a unique dual index for sample multiplexing during sequencing. The final libraries contained P5 and P7 primers required for Illumina bridge amplification. Sequencing was performed on an Illumina sequencing platform (Novaseq 6000) using paired-end 28+90bp sequencing. One end of the sequencing read generated cell-specific, barcoded sequences and unique molecular identifier (UMI), while the other end captured the sequence of the expressed poly-A tailed mRNA. The sequencing was carried out using two full FP flow cells to achieve an approximate read count of 50,000 per cell.

**Reconstruction of the MALP dataset acquired by Zhong *et al*.**

We utilized the raw UMI count text file of 3-month-old mice from the Gene Expression Omnibus (GEO) series GSE145477 to reconstruct a UMAP representation. The data was preprocessed in R v4.1.0 with Seurat v4.1.0. Cells with unique feature counts below 200 or exceeding 6000 as well as cells with a mitochondrial count percentage exceeding 5% were excluded. Additionally, barcodes with UMI count below 200 or above 40000 were also removed. The data underwent log normalization with a scale factor of 10000, the top 2000 highly variable genes were identified by the vst method and scaled. Principal component analysis (PCA) was conducted on the scaled data and k-nearest neighbors were computed using the default Seurat settings and 40 principal components (PC) for FindNeigbors(). Subsequently, clusters identification by FindClusters() and UMAP visualization by RunUMAP() was conducted with a resolution of 0.8. After manual annotation of the clusters, differential expression analysis was carried out with FindAllMarkers() in default settings.
